# Supplementary material
Source: PubMed Central journal article supplement (PMC5878683)
Supplement: NIHMS76047-supplement-Supplementary_tables.pdf [file NIHMS76047-supplement-Supplementary_tables.pdf]

# 1 Behavioural data analysis

**Supplementary Table 1.** Hierarchical logistic regressions on accuracy; coefficient standard error displayed in parentheses.

|                        | <i>Dependent variable:</i> |                   |
|------------------------|----------------------------|-------------------|
|                        | Accuracy                   |                   |
|                        | Behaviour                  | fMRI              |
|                        | (1)                        | (2)               |
| pre-decision coherence | 9.21***<br>(0.74)          | 7.00***<br>(0.70) |
| Constant               | -0.10<br>(0.09)            | -0.01<br>(0.08)   |
| Observations           | 22,500                     | 7,858             |

*Note:* \*p<0.05; \*\*p<0.01; \*\*\*p<0.001

**Supplementary Table 2.** Hierarchical linear regressions on confidence; coefficient standard error displayed in parentheses.

|                         | <i>Dependent variable:</i> |                    |                     |                    |
|-------------------------|----------------------------|--------------------|---------------------|--------------------|
|                         | Confidence                 |                    |                     |                    |
|                         | Behav. correct             | Behav. error       | fMRI correct        | fMRI error         |
|                         | (1)                        | (2)                | (3)                 | (4)                |
| pre-decision coherence  | 0.36***<br>(0.07)          | -0.47**<br>(0.18)  | 0.41***<br>(0.08)   | -0.29*<br>(0.14)   |
| post-decision coherence | 0.41***<br>(0.08)          | -1.15***<br>(0.14) | 0.54***<br>(0.08)   | -1.05***<br>(0.11) |
| log(RT)                 | -0.03***<br>(0.004)        | -0.03***<br>(0.01) | -0.03***<br>(0.004) | -0.03*<br>(0.01)   |
| pre*post coherence      | -0.74***<br>(0.17)         | 1.17**<br>(0.40)   | -0.92***<br>(0.18)  | 0.92***<br>(0.28)  |
| Constant                | 0.76***<br>(0.04)          | 0.78***<br>(0.06)  | 0.71***<br>(0.03)   | 0.71***<br>(0.04)  |
| Observations            | 19,341                     | 3,159              | 6,132               | 1,677              |

*Note:* \*p<0.05; \*\*p<0.01; \*\*\*p<0.001

## 2 Computational model parameters

**Supplementary Table 3.** Parameter estimates (mean (S.E.M.) across subjects) from Bayesian+RT model

| Parameter    | Behavioural session | fMRI session |
|--------------|---------------------|--------------|
| $k$          | 5.28 (0.40)         | 4.98 (0.35)  |
| $m$          | 0.00 (0.03)         | -0.07 (0.08) |
| $\beta_{RT}$ | -0.73 (0.26)        | -0.37 (0.22) |

## 3 fMRI data analysis

**Supplementary Table 4.** Significant activations for the post-decision motion strength  $\times$  accuracy interaction effect from GLM1, thresholded at  $P < 0.05$  FWE with cluster-defining threshold of  $P < 0.001$  uncorrected.  $N=22$  subjects.

| Sign     | Label  | MNI peak | T statistic | Voxels | Laterality |
|----------|--------|----------|-------------|--------|------------|
| Negative | pMFC   | 6 18 50  | 8.64        | 177    | L/R        |
|          | Insula | 44 14 -6 | 4.89        | 87     | R          |

**Supplementary Table 5.** Hierarchical regression of motion strength on activity in regions of interest; coefficient standard error displayed in parentheses.

|                         | <i>Dependent variable:</i> |                   |                 |                   |                    |                    |
|-------------------------|----------------------------|-------------------|-----------------|-------------------|--------------------|--------------------|
|                         | BOLD                       |                   |                 |                   |                    |                    |
|                         | pMFC<br>(1)                | area 46<br>(2)    | FPl<br>(3)      | FPm<br>(4)        | vmPFC<br>(5)       | v. striatum<br>(6) |
| accuracy                | −0.31***<br>(0.05)         | −0.13**<br>(0.04) | −0.06<br>(0.04) | 0.10**<br>(0.04)  | 0.16***<br>(0.04)  | 0.09*<br>(0.04)    |
| pre-decision coherence  | 0.05<br>(0.04)             | 0.03<br>(0.04)    | 0.03<br>(0.04)  | −0.01<br>(0.04)   | −0.005<br>(0.04)   | −0.04<br>(0.04)    |
| post-decision coherence | 0.07*<br>(0.03)            | 0.01<br>(0.03)    | 0.02<br>(0.03)  | 0.003<br>(0.03)   | 0.03<br>(0.04)     | 0.002<br>(0.03)    |
| pre*accuracy            | −0.07<br>(0.04)            | −0.02<br>(0.05)   | 0.01<br>(0.05)  | 0.06<br>(0.04)    | 0.05<br>(0.04)     | 0.07<br>(0.05)     |
| post*accuracy           | −0.11**<br>(0.04)          | −0.02<br>(0.04)   | 0.001<br>(0.04) | 0.05<br>(0.04)    | 0.04<br>(0.04)     | 0.06<br>(0.03)     |
| log(RT)                 | 0.10***<br>(0.02)          | 0.05***<br>(0.01) | 0.03<br>(0.01)  | −0.02<br>(0.02)   | −0.05*<br>(0.02)   | −0.002<br>(0.01)   |
| Constant                | 0.26***<br>(0.05)          | 0.11**<br>(0.04)  | 0.05<br>(0.04)  | −0.08**<br>(0.03) | −0.13***<br>(0.03) | −0.08*<br>(0.04)   |
| Observations            | 7,734                      | 7,734             | 7,734           | 7,734             | 7,734              | 7,734              |

*Note:*

\*p<0.05; \*\*p<0.01; \*\*\*p<0.001

**Supplementary Table 6.** Confidence-related activations. Significant positive/negative clusters correlating with reported confidence, thresholded at  $P < 0.05$  FWE corrected for multiple comparisons with cluster-defining threshold of  $P < 0.001$  uncorrected.  $N=22$  subjects.

| Sign     | Label                           | MNI peak    | Voxels | Laterality |
|----------|---------------------------------|-------------|--------|------------|
| Positive | mPFC / temporal lobe / striatum | -2 8 -6     | 3755   | L/R        |
|          | Precuneus / medial parietal     | -6 -60 18   | 2357   | L/R        |
|          | Temporal lobe                   | -60 -20 -12 | 566    | L          |
|          | Temporal lobe                   | 60 -14 -14  | 917    | R          |
|          | White matter                    | -26 -40 18  | 187    | L          |
|          | White matter                    | 24 -40 20   | 328    | R          |
|          | Inf. parietal                   | -40 -78 36  | 289    | L          |
|          | Sup. occipital                  | 14 -86 34   | 205    | R          |
|          | Middle frontal gyrus            | 22 32 46    | 106    | R          |
|          | Precentral gyrus                | 56 -10 50   | 528    | R          |
|          | Middle frontal gyrus            | -24 30 46   | 81     | L          |
|          | Paracentral lobule              | -8 -32 58   | 385    | L/R        |
| Negative | Cerebellum                      | 20 -72 -42  | 113    | R          |
|          | Cerebellum                      | 24 -68 -30  | 1764   | R          |
|          | Occipital / inf. parietal       | -40 -42 40  | 7272   | L          |
|          | Lateral prefrontal / insula     | -44 0 38    | 14204  | L/R        |
|          | Thalamus                        | -8 -24 -6   | 1312   | L/R        |
|          | Occipital / inf. parietal       | 50 -38 52   | 5245   | R          |
|          | pMFC                            | -8 -36 26   | 316    | L/R        |

**Supplementary Table 7.** Split hierarchical regression of confidence on activity in regions of interest; coefficient standard error displayed in parentheses.

|                       | <i>Dependent variable:</i> |                    |                  |                  |                    |                  |
|-----------------------|----------------------------|--------------------|------------------|------------------|--------------------|------------------|
|                       | BOLD                       |                    |                  |                  |                    |                  |
|                       | pMFC                       | area 46            | FPI              | FPm              | vmPFC              | v. striatum      |
|                       | (1)                        | (2)                | (3)              | (4)              | (5)                | (6)              |
| Confidence $\leq 0.5$ | -0.29<br>(0.18)            | -0.35*<br>(0.15)   | -0.41*<br>(0.17) | -0.27<br>(0.16)  | -0.07<br>(0.18)    | -0.18<br>(0.14)  |
| Confidence $> 0.5$    | -0.47***<br>(0.06)         | -0.24***<br>(0.05) | -0.12*<br>(0.06) | 0.12**<br>(0.05) | 0.26***<br>(0.04)  | 0.11*<br>(0.05)  |
| log(RT)               | 0.07***<br>(0.02)          | 0.04*<br>(0.02)    | 0.02<br>(0.02)   | -0.01<br>(0.02)  | -0.04*<br>(0.02)   | -0.004<br>(0.02) |
| Constant              | 0.38***<br>(0.05)          | 0.21***<br>(0.05)  | 0.11*<br>(0.05)  | -0.08*<br>(0.04) | -0.20***<br>(0.04) | -0.07<br>(0.04)  |
| Observations          | 7,726                      | 7,726              | 7,726            | 7,726            | 7,726              | 7,726            |

*Note:*

\* $p < 0.05$ ; \*\* $p < 0.01$ ; \*\*\* $p < 0.001$

**Supplementary Table 8.** ROI mediation results; coefficient standard error displayed in parentheses with bootstrapped p-values. N=22 subjects.

|               |                                   | area 46                                                      | FPI                                                               | FPM                                                          |
|---------------|-----------------------------------|--------------------------------------------------------------|-------------------------------------------------------------------|--------------------------------------------------------------|
|               |                                   | (1)                                                          | (2)                                                               | (3)                                                          |
| Forward model | Path <i>a</i>                     | -0.04*<br>(0.02)<br>p = 0.028                                | -0.01<br>(0.02)<br>p = 0.39                                       | 0.04**<br>(0.01)<br>p = 0.0067                               |
|               | Path <i>b</i>                     | -0.03**<br>(0.01)<br>p = 0.0021                              | -0.01<br>(0.01)<br>p = 0.18                                       | 0.02*<br>(0.01)<br>p = 0.027                                 |
|               | Direct ( <i>c'</i> )              | 0.50***<br>(0.03)<br>p = $5.8 \times 10^{-4}$                | 0.50***<br>(0.03)<br>p = $5.8 \times 10^{-4}$                     | 0.50***<br>(0.03)<br>p = $6.2 \times 10^{-4}$                |
|               | Mediation ( <i>a</i> × <i>b</i> ) | 0.002**<br>( $5.1 \times 10^{-4}$ )<br>p = 0.0027            | $8.5 \times 10^{-4}$ **<br>( $3.0 \times 10^{-4}$ )<br>p = 0.0056 | $5.7 \times 10^{-4}$<br>( $3.9 \times 10^{-4}$ )<br>p = 0.20 |
| Control model | Path <i>a</i>                     | -0.07***<br>(0.02)<br>p = $4.0 \times 10^{-4}$               | -0.03<br>(0.02)<br>p = 0.15                                       | 0.05**<br>(0.02)<br>p = 0.0033                               |
|               | Path <i>b</i>                     | -0.004<br>(0.008)<br>p = 0.58                                | -0.003<br>(0.008)<br>p = 0.68                                     | 0.01<br>(0.008)<br>p = 0.24                                  |
|               | Direct ( <i>c'</i> )              | 0.49***<br>(0.04)<br>p = $5.3 \times 10^{-4}$                | 0.49***<br>(0.04)<br>p = $4.9 \times 10^{-4}$                     | 0.49***<br>(0.04)<br>p = $5.4 \times 10^{-4}$                |
|               | Mediation ( <i>a</i> × <i>b</i> ) | $3.1 \times 10^{-4}$<br>( $4.7 \times 10^{-4}$ )<br>p = 0.54 | $2.8 \times 10^{-4}$<br>( $3.8 \times 10^{-4}$ )<br>p = 0.46      | $2.9 \times 10^{-4}$<br>( $2.8 \times 10^{-4}$ )<br>p = 0.32 |

*Note:*

\*p<0.05; \*\*p<0.01; \*\*\*p<0.001
